# Supplementary material for: A thaumatin-like protein of Ocimum basilicum confers tolerance to fungal pathogen and abiotic stress in transgenic Arabidopsis
Source: PubMed Central journal article supplement (PMC4858651; doi:10.1038/srep25340), 2016-05-06
Supplement: srep25340-s1.pdf [file srep25340-s1.pdf]

**Manuscript Title:**

**A thaumatin-like protein of *Ocimum basilicum* confers tolerance to fungal pathogen and abiotic stress in transgenic Arabidopsis**

Author List:

Rajesh Chandra Misra, Sandeep, Mohan Kamthan, Santosh Kumar and Sumit Ghosh\*

**Supplementary Information**

Supplementary Figure S1-S7

Supplementary Table S1-S2

```

Ocimumbasilicum_AGX15390.1_      MISLKFIST----LLPF-LLLLHA-ATAIRFDIQNKCSYTIWPAVLP--- 41
ObTLP1_JQ793640_                 MNSLKFIST----LLPFLLLLHA-ATAIRFDIQNKCSYTIWPAVLP--- 42
Thaumatococcusdaniellii_P02884  MAATTCFFF----LFPF-LLLLTL-SRAATFEIVNRCSYTVWAAASKGD- 43
Solanumnigrum_AGH14263.1_        MGYL-RSSF-----VFFLLAFVTY-TYAATIEVRNRCPTVWAASTPI-- 41
Solanumnigrum_AAL87640.1_        MGYS-RSSF-----VFFLLTFVTY-TYATSFVRNRCPTVWAASTPI-- 41
Nicotianatabacum_P14170.2_       MGNL-RSSF-----VFFLLALVTY-TYAATIEVRNRCPTVWAASTPI-- 41
Actinidiachinensis_AGC39177.1_   MGYL-TMAFG--LPVFLLLTLFSS-AHAATFEIRNRCPTVWAAASP--- 43
Ficuspumilavar.Awkeotsang_ABB8   MGS LANLSII--FSLIFLTLFSS-SNAASF EIRNECSYPVWAAASP--- 44
Camelliasinensis_ABE01396.1_     MSFPKSLTIL--FPLL F-TLLIPF-TNAATFAVLNKCTYTVWAAASP--- 43
Arabidopsisthaliana_CAA61411.1_  MANLLVSTF-----IFSALLLIST-ATAATFEILNQCSTVWAAASP--- 41
Glycinemax_P25096.1_             -----ARFEITNRCTYTVWAAASVPV-- 20
Vitisvinifera_AAQ10092.1_        MGLCKILSI---SSFLLTALFFTP-SYAATFN IQNHCSYTVWAAAVP--- 43
Actinidiachinensis_AGC39176.1_   MSTFKLSL---SALLFIAFLFC-ARGATFN IINRCPTVWAAAVP--- 43
Fragariaananassa_AAF13707.1_     MSLLKNLP----TVLSILYFAAST-VNAATFNKKNCPFTVWAGAVP--- 42
Sambucusnigra_AAK59275.1_        MGFLKSLPI---SIFVIALISSS-AYAANFNIRNRCPTVWAAAVP--- 43
Vincetoxicummongolicum_AD03289  MN-FHFSS---LLVLVLSCLFAT-SYAATFVVTNRCQYVWAAAGVPV-- 43
Oryzasativa_P31110.1_            MASPATSSAV--LVVVLVATLAAGGANAAFTITNRCSFTVWPAATP--- 45
Pyruspyrifolia_AE036939.1_       MSMMKNQVA--SLLGLTLAILFFSGA HAAKITFTNRCPTVWPGTLTGDQ 48
Arachisdiogoi_ACT11052.1_        MAITR-----VVL SLSFA-FFLCVAHGAQITLTKCSYTVWPGSQANAN 43
Medicago truncatula_AFK44890.1_  MASSSSSSTNSLLISTFIFLTFSPSQALIFTVNNRCPTVWPAIIPNGG 50
                                     :  *.* :.:*..

Ocimumbasilicum_AGX15390.1_      ----HGGRRRLDSGQTWTL SFQNGPKLAKVWARTNCTFDSGKGKCLTGD 87
ObTLP1_JQ793640_                 ----HGGRRRLDSGQTWTL SFQNGPKLAKVWARTNCTFDSGKGKCLTGD 88
Thaumatococcusdaniellii_P02884  -AALDAGGRQLNSGESWTINVEPGTKGGKIWARTDCYFDDSGRGCRTGD 92
Solanumnigrum_AGH14263.1_        ----GGRRRLDRGQTWVINAPRGTS MARIWGR TNCFD GAGRGSCQTGD 86
Solanumnigrum_AAL87640.1_        ----GGRRRLDRGQTWVINAPRGTS MARIWGR TNCFD GAGRGSCQTGD 86
Nicotianatabacum_P14170.2_       ----GGRRRLDRGQTWVINAPRGTKMARVWGR TNCFNFAAGRGTCQTGD 86
Actinidiachinensis_AGC39177.1_   ----GGRRRLNSKQQWNLNVAAGTKMARIWGR TKCNFDGSGRGHCETGD 88
Ficuspumilavar.Awkeotsang_ABB8   ----GGRRLDPTQNWILNVPAGTSMARIWGR TNCFD GAGRGRCQTGD 89
Camelliasinensis_ABE01396.1_     ----GGMRLDPGQSWTVNVPGTQARIWGR TNCFD ANGNQCQTGD 88
Arabidopsisthaliana_CAA61411.1_  ----GGRRLDAGQSWRLDVAAGTKMARIWGR TNCFD SSGRGRRCQTGD 86
Glycinemax_P25096.1_             ----GGVQLNPGQSWSDVPAGTKGARVWARTGCNFDGSGRGGCQTGD 65
Vitisvinifera_AAQ10092.1_        ----GGMQLGSGQSWSLNVAAGTTGGRVWARTCNFDASGNGKCE TGD 88
Actinidiachinensis_AGC39176.1_   ----GGKRLDRGQNWII NPAGTKGARVWARTGCNFDGAGRGK CQTGD 88
Fragariaananassa_AAF13707.1_     ----GGKQLGTGQWTVINVAAGTKGARIWPR TNCFD GAGRGRCQTGD 87
Sambucusnigra_AAK59275.1_        ----GGRQLNRGQVWLDVPAGTRGARIWARTCNFDGAGRGRCQTGD 88
Vincetoxicummongolicum_AD03289  ----GGRRRLDRGQVWRL EVPAGTKQARIWGR TNCFD ASGRGKCE TGD 88
Oryzasativa_P31110.1_            ----VGGVQLSPGQWTVINVPAGTSSGRVWGR TGCSFDGSGRGSCATGD 91
Pyruspyrifolia_AE036939.1_       KPQLSLTG FELASKASQSDAP-FPWSGRFWGRTRCSTNAGKFTCE TAD 97
Arachisdiogoi_ACT11052.1_        SAQLSTTG FELPTGQSKTV DVP-APWSGKFWARTGCS-NNNGVFSCATAD 91
Medicago truncatula_AFK44890.1_  FVLSSSGFELRHFTHLSIPVPDTHWAGRAWARTGCS-TANNKF SCLTGD 99
                                     * .* : : * * * * . * * *

```

**Supplementary Figure S1.** Amino acid sequence comparison of *O. basilicum* ObTLP1 with PR5 members of other plant species. Multiple sequence alignment was carried out by using ClustalW2 program (<http://www.ebi.ac.uk/Tools/msa/clustalw2/>). Identical amino acid residues are depicted as \*, while conserved and semi-conserved substitutions are marked as : and ., respectively. Sixteen cysteine residues that are conserved in TLPs are highlighted.

Ocimumbasilicum\_AGX15390.1\_ CGG-QLNCTTFG-SPPHTKAEYGLNDFGRKDY--YDVSVLVDGYNLPMEMT 133  
 ObTLP1\_JQ793640\_ CGG-QLNCTTFG-SPPHTKAEYGLNDFGRKDY--YDVSVLVDGYNLPMEMT 134  
 Solanumnigrum\_AAL87640.1\_ CGG-VLQCTGWG-KPPNTLAEYALNQFSNLDF--WDISLVDGFNIPMTFA 132  
 Nicotianatabacum\_P14170.2\_ CGG-VLQCTGWG-KPPNTLAEYALDQFSGLDF--WDISLVDGFNIPMTFA 132  
 Actinidiachinensis\_AGC39177.1\_ CGG-VLECKGWG-VPPNTLAEYALNQFGNLDF--FDISLVDGFNIPMDFS 134  
 Ficuspumilavar.Awkeotsang\_ABB8 CGG-LLQCQGWG-NPPNTLAEHALNQFGNLDF--YDISLVDGFNIPMSFG 135  
 Camelliasinensis\_ABE01396.1\_ CNG-LLQCQGYG-KAPNTLAEFALNQPNLDF--VDISNVDGFNIPMDFS 134  
 Arabidopsisthaliana\_CAA61411.1\_ CSG-GLQCTGWG-QPPNTLAEYALNQFNNLDF--YDISLVDGFNIPMEFS 132  
 Glycinemax\_P25096.1\_ CGG-VLDCKAYG-APPNTLAEYGLNGFNNLDF--FDISLVDGFNVPMDFS 111  
 Vitisvinifera\_AAQ10092.1\_ CGG-LLQCTAYG-TPPNTLAEFALNQFSNLDF--FDISLVDGFNVPMAFN 134  
 Actinidiachinensis\_AGC39176.1\_ CNG-LLQCQAFG-QPPNTLAEYALNQFNNLDF--FDISLVDGFNVAMEFS 134  
 Fragariaananassa\_AAF13707.1\_ CGG-LLQCQGYG-QPPNTLAEYALNQYMNRF--YDISLVDGFNVPMDFS 133  
 Sambucusnigra\_AAK59275.1\_ CNG-LLSCQAYG-APPNTLAEYALNQFNNLDF--FDISLVDGFNVAMDFS 134  
 Vincetoxicummongolicum\_AD03289 CNG-LLQCQKNG-SPPNTLAEFALNQFANKDF--FDISLVDGFNVPMDFS 134  
 Oryzasativa\_P31110.1\_ CAG-ALSCSLSG-QKPLTAEFTIG--GSQDF--YDLSVIDGYNVAMSFS 135  
 Pyruspyrifolia\_AE036939.1\_ CGSGQVACNGAGAIPPATLVEITIAANGGQDF--YDVSVLVDGFNLPMPSVA 145  
 Arachisdiogoi\_ACT11052.1\_ CGN-HLECSGAGEATPASLMFTIASNGGQDF--YDVSNVDGFNVPSGIT 138  
 Medicagotruncatula\_AFK44890.1\_ CGN-SLQCHGAGGSPATLVQFDVH-HGNKDFSSYSVSLVDGFNTPLTVT 147  
 \* . : \* \* \* : : : \* : . : \* : \* : .

Ocimumbasilicum\_AGX15390.1\_ PTAN--GCTRSVKCAEDIVANCPSQLKVDGG-----CQNPCTVFK 172  
 ObTLP1\_JQ793640\_ PTTN--GCTRSVKCAEDIVANCPSQLKVDGG-----CQNPCTVFK 173  
 Thaumtococcusdaniellii\_P02884 PTTR--GC-RGVRCAAD-IVGQCPAKLKAPGG-----GCNDACTVFQ 175  
 Solanumnigrum\_AGH14263.1\_ PTNPSSGKCHSIQCTAN-INGECPAALRVPGG-----CQNPCTVFK 172  
 Solanumnigrum\_AAL87640.1\_ PTNPSSGKCHSIQCTAN-INGECPAALRVPGG-----CQNPCTVFK 172  
 Nicotianatabacum\_P14170.2\_ PTNPSSGKCHAIHCTAN-INGECPRELVRPVG-----CQNPCTVFK 172  
 Actinidiachinensis\_AGC39177.1\_ PTRSPSGKCRPISCTAN-IIGQCPNPLKTAGG-----CHNPCTVFK 174  
 Ficuspumilavar.Awkeotsang\_ABB8 PTR---GGCKVIGCTAD-INGQCPNELRTPGG-----CQNPCTVFK 172  
 Camelliasinensis\_ABE01396.1\_ PTT---AVCKSLRCAAN-IVGECPAELQTPGG-----CQNPCTVFK 171  
 Arabidopsisthaliana\_CAA61411.1\_ PTS---SNCHRILCTAD-INGQCPNVLRAPGG-----CQNPCTVFK 169  
 Glycinemax\_P25096.1\_ PTSN--GCTRGISCTAD-INGQCPSELKTQGG-----CQNPCTVFK 149  
 Vitisvinifera\_AAQ10092.1\_ PTSN--GCTRGISCTAD-IVGECPAALKTTGG-----CQNPCTVFK 172  
 Actinidiachinensis\_AGC39176.1\_ PTSG--GCTRGIKCTAN-INEQCPNELRAPGG-----CQNPCTVFK 172  
 Fragariaananassa\_AAF13707.1\_ PVSN--GCTRGIRCTAD-INGQCPAQLRAPGG-----CQNPCTVSK 171  
 Sambucusnigra\_AAK59275.1\_ PTG---GCARGIQCTAD-INGQCPNELRAPGG-----CQNPCTVYR 171  
 Vincetoxicummongolicum\_AD03289 PTSN--GCSRGIKCAAQ-INRECPNQLKAPGG-----CQNPCTVFK 172  
 Oryzasativa\_P31110.1\_ CSSG---VTVTCRDS----- 147  
 Pyruspyrifolia\_AE036939.1\_ PQGGT-GDCKPSSCPAN-VNAACPAQLQVKA--ADGTVIA-CKSACLAFG 190  
 Arachisdiogoi\_ACT11052.1\_ PQGGS-GACNVASCPAN-INAACPAALQFKG--SDGSVIG-CKSACVEFG 183  
 Medicagotruncatula\_AFK44890.1\_ PHEGK-GECPVVGCKAD-LVASCPPVLQHRVPMGHGPVVA-CKSGCEAFH 194  
 \*

Supplementary Figure S1. Continued.

|                                 |                                                   |     |
|---------------------------------|---------------------------------------------------|-----|
| Ocimumbasilicum_AGX15390.1_     | TTEYCCHAGK-----CRPTDMSRFFKSRCDRAFTYPQDDPTST--FTCP | 215 |
| ObTLP1_JQ793640_                | TTEYCCHAGE-----CRPTDMSRFFKSRCDRAFTYPQDDPTST--FTCP | 216 |
| Thaumatococcusdaniellii_P02884  | TSEYCCTTGK-----CGPTEYSRFFKRLCPDAFSYVLDPKPT-T--VTC | 217 |
| Solanumnigrum_AGH14263.1_       | GQQYCCTQGP-----CGPTELSRFFKQRCPDAYSYPQDDPTST--FTCP | 215 |
| Solanumnigrum_AAL87640.1_       | GQQYCCTQGP-----CGPTELSKFFKQRCPDAYSYPQDDPTST--FTCP | 215 |
| Nicotianatabacum_P14170.2_      | GQQYCCTQGP-----CGPTFFSKFFKQRCPDAYSYPQDDPTST--FTCP | 215 |
| Actinidiachinensis_AGC39177.1_  | TQEYCCTQGP-----CGPTNYSRFFKERCDAYSYPQDDPTST--FTCP  | 217 |
| Ficusdumilavar.Awkeotsang_ABB8  | TNEFCCTNGOG---SCGPTNFSKFFKDRCDAYSYPQDDPTST--FTCP  | 217 |
| Glycinemax_P25096.1_            | TDQYCCNSGS-----CGPTDYSRFFKQRCPDAYSYPKDDPPST--FTCN | 192 |
| Vitisvinifera_AAQ10092.1_       | TDEYCCNSGS-----CNATDYSRFFKTRCPDAYSYPKDDQTST--FTCP | 215 |
| Actinidiachinensis_AGC39176.1_  | TDQYCCNSGN-----CGPTDYSRFFKTRCPDAYSYPKDDQTST--FTCP | 215 |
| Fragariaaxananassa_AAF13707.1_  | TDQYCCNSGH-----CGPTDYSRFFKSRCPDAYSYPKDDATSTVLF    | 216 |
| Sambucusnigra_AAK59275.1_       | TNEYCCTNGQG---TCGPTNFSRFFKERCDAYSYPQDDPTST--FTCP  | 216 |
| Vincetoxicummongolicum_AD03289  | TDQYCCNSGR-----CSPTNFSFFKRCRCPDAYSYPKDDQTST--FTCP | 215 |
| Oryzasativa_P31110.1_           | -----RCPDAYLFPEDNTKTH---ACSG                      | 167 |
| Pyruspyrifolia_AE036939.1_      | DSKYCCTPPNNTPETCPPEYSQFFEQQCPQAYSAYDDKNST--FTCS   | 238 |
| Arachisdiogoi_ACT11052.1_       | TPEYCCTGDHNTAATCPATNYSFFFNQCPNAYSAYDDKRGTT--FTCS  | 231 |
| Medicago truncatula_AFK44890.1_ | SDEHCCRNFHFNPTCKPTVYSKFFKDAACPATFTFAHDSPLI--HQCS  | 242 |

\* :: : \*

|                                 |                                      |     |
|---------------------------------|--------------------------------------|-----|
| Ocimumbasilicum_AGX15390.1_     | ST-SYRVVFCP-----                     | 225 |
| ObTLP1_JQ793640_                | ST-SYRVVFCP-----                     | 226 |
| Thaumatococcusdaniellii_P02884  | SS-NYRVTFPCPTALELEDE-----            | 235 |
| Solanumnigrum_AGH14263.1_       | GSTNYRVVFCPNGVT----SPNLPLERPASTDKVAN | 247 |
| Solanumnigrum_AAL87640.1_       | DSTNYRVVFCPNGVT----SPNFPLEMPSSTDEVAK | 247 |
| Nicotianatabacum_P14170.2_      | GSTNYRVVFCPNGQA---HPNFPLEMPGS-DEVAK  | 246 |
| Actinidiachinensis_AGC39177.1_  | GS-NYRVTFPCPNG-----SPHFPLEMYGESDVE-- | 244 |
| Ficusdumilavar.Awkeotsang_ABB8  | GA-NYKVVFCPRA-----SAHFPLEMVKSASES--  | 244 |
| Camelliasinensis_ABE01396.1_    | GT-NYAITFCP-----                     | 226 |
| Arabidopsisthaliana_CAA61411.1  | TN--YRVVFCPRSRLGATGSHQLPIKMVTEEN---- | 244 |
| Glycinemax_P25096.1_            | GT-DYRVVFCP-----                     | 202 |
| Vitisvinifera_AAQ10092.1_       | GT-NYEVVFCP-----                     | 225 |
| Actinidiachinensis_AGC39176.1_  | GT-NYKVVFCP-----                     | 225 |
| Fragariaaxananassa_AAF13707.1_  | GT-NYRVVFCP-----                     | 226 |
| Sambucusnigra_AAK59275.1_       | GT-NYRVVFCP-----                     | 226 |
| Vincetoxicummongolicum_AD03289  | GT-NYRVVFCP-----                     | 225 |
| Oryzasativa_P31110.1_           | NS-NYQVVFCP-----                     | 177 |
| Pyruspyrifolia_AE036939.1_      | GP-DYVITFCP-----                     | 248 |
| Arachisdiogoi_ACT11052.1_       | SP-NYAINFCP-----                     | 241 |
| Medicago truncatula_AFK44890.1_ | PG-ELKVIFCH-----                     | 252 |

: \*\*

**Supplementary Figure S1. Continued.**

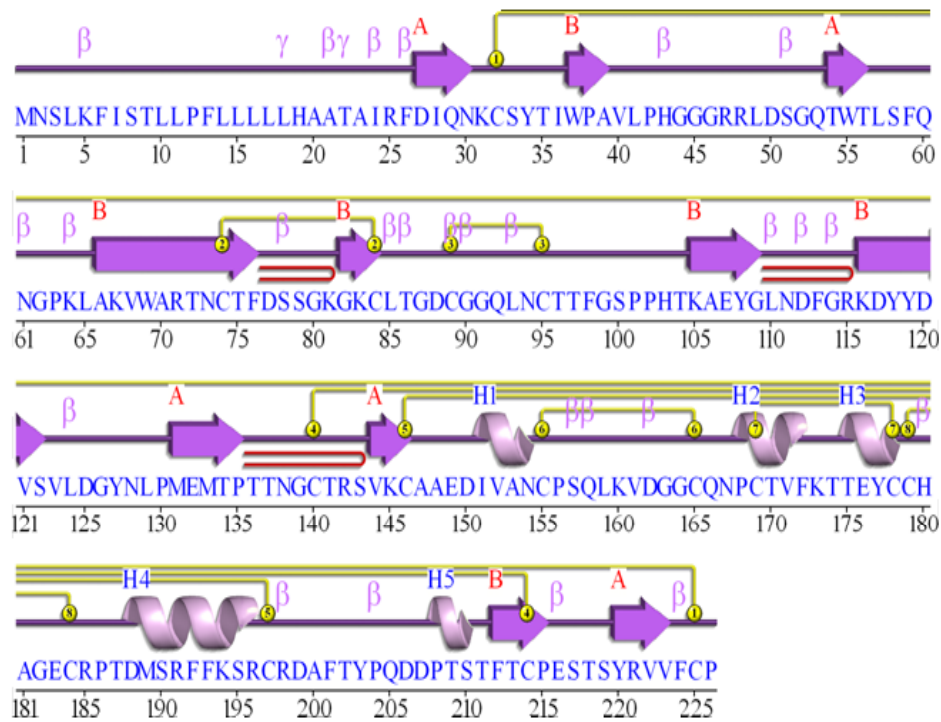

### Key:

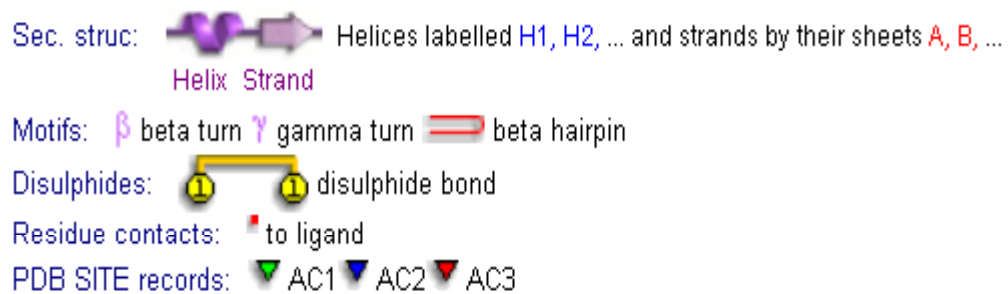

**Supplementary Figure S2.** A schematic presentation of the secondary structural elements in ObTLP1.  $\alpha$ -helices are labeled with the letter 'H', and  $\beta$ -strands are lettered in uppercase.  $\beta$ ,  $\gamma$ , and hairpin turns are also labeled. Eight disulphide bonds are mentioned with numbers 1 to 8. The secondary structure of *O. basilicum* ObTLP1 was determined using the PDBsum tool.



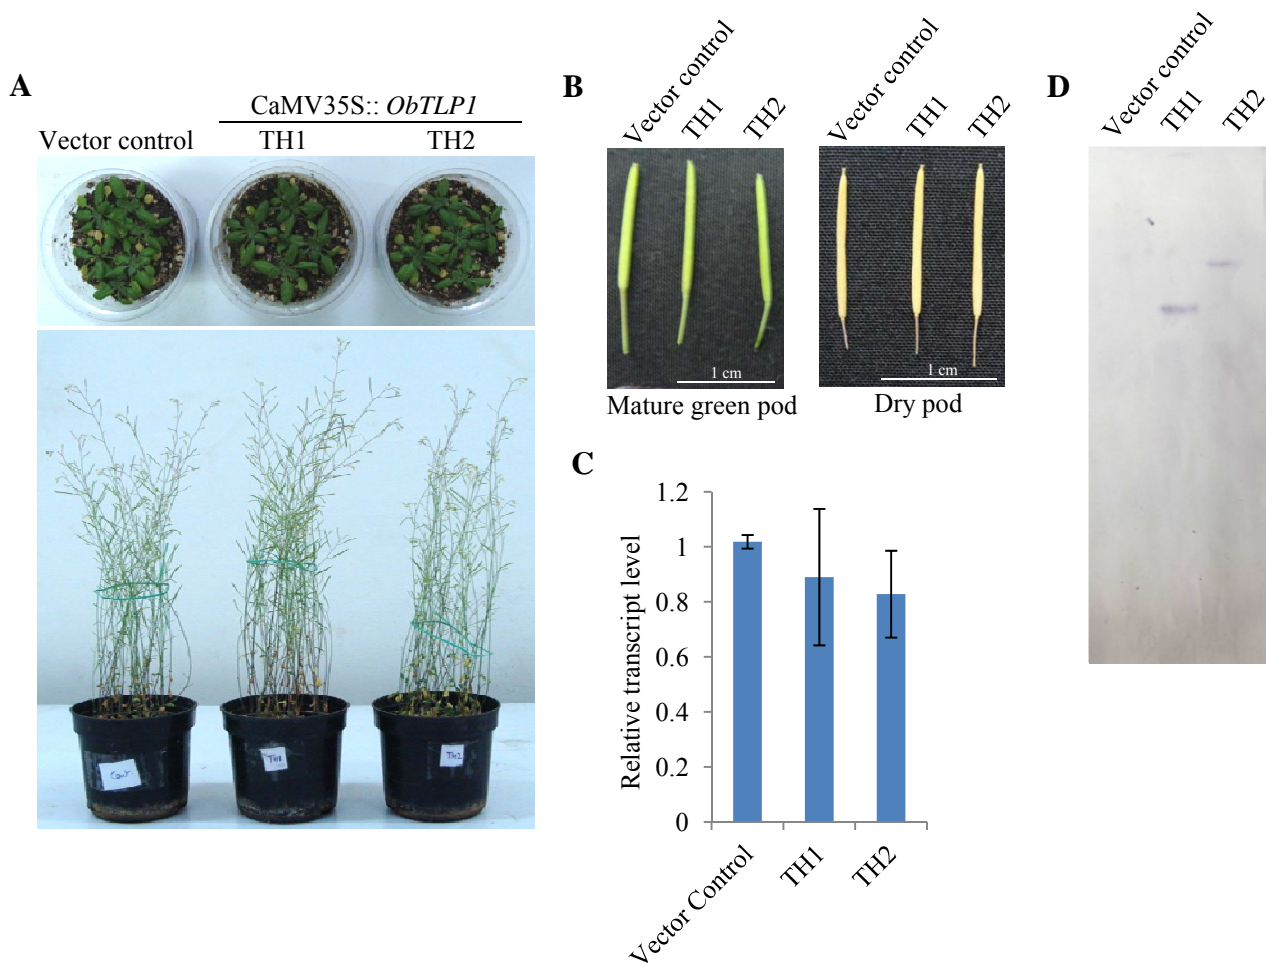

**Supplementary Figure S3.** Phenotypic and molecular characterization of *ObTLP1*-expressing Arabidopsis transgenic lines. (A) Photographs of vector control and *ObTLP1*-expressing Arabidopsis transgenic lines, taken at different growth stages. (B) Photographs of mature green and dry pods are shown. (C) Relative transcript level of Arabidopsis *AtOSM34* (AT4G11650), an ortholog of *ObTLP1*, was determined by qRT-PCR analysis. Data are mean  $\pm$  s.d. from three biological replicates. (D) Southern blotting to determine transgene copy number in *ObTLP1*-expressing Arabidopsis transgenic lines. Genomic DNA (15  $\mu$ g) was digested with XbaI and BamHI, precipitated with Ethanol/Sodium Acetate and electrophoresed on 0.8% Agarose gel. After depurination and denaturation, resolved DNAs were transferred onto Hybond N+ (GE Healthcare) following capillary method, and UV cross-linked. *ObTLP1* cDNA (725 bp) was DIG labelled and hybridized to membrane (DIG-System; Roche Diagnostics). Prehybridisation and hybridisation were performed at 65°C with standard buffer (5X SSC, 0.1% N-lauroylsarcosine, 0.02% SDS, 1% blocking reagent-Roche-11096176001). Detection was performed using an alkaline phosphatase-conjugated anti-digoxigenin antibody at 1:5000 dilutions (Roche-11093274910). After washing, blot was developed following colorimetric detection method using NBT and BCIP in detection buffer (0.1M Tris-HCl, pH-9.5 and 0.1M NaCl).

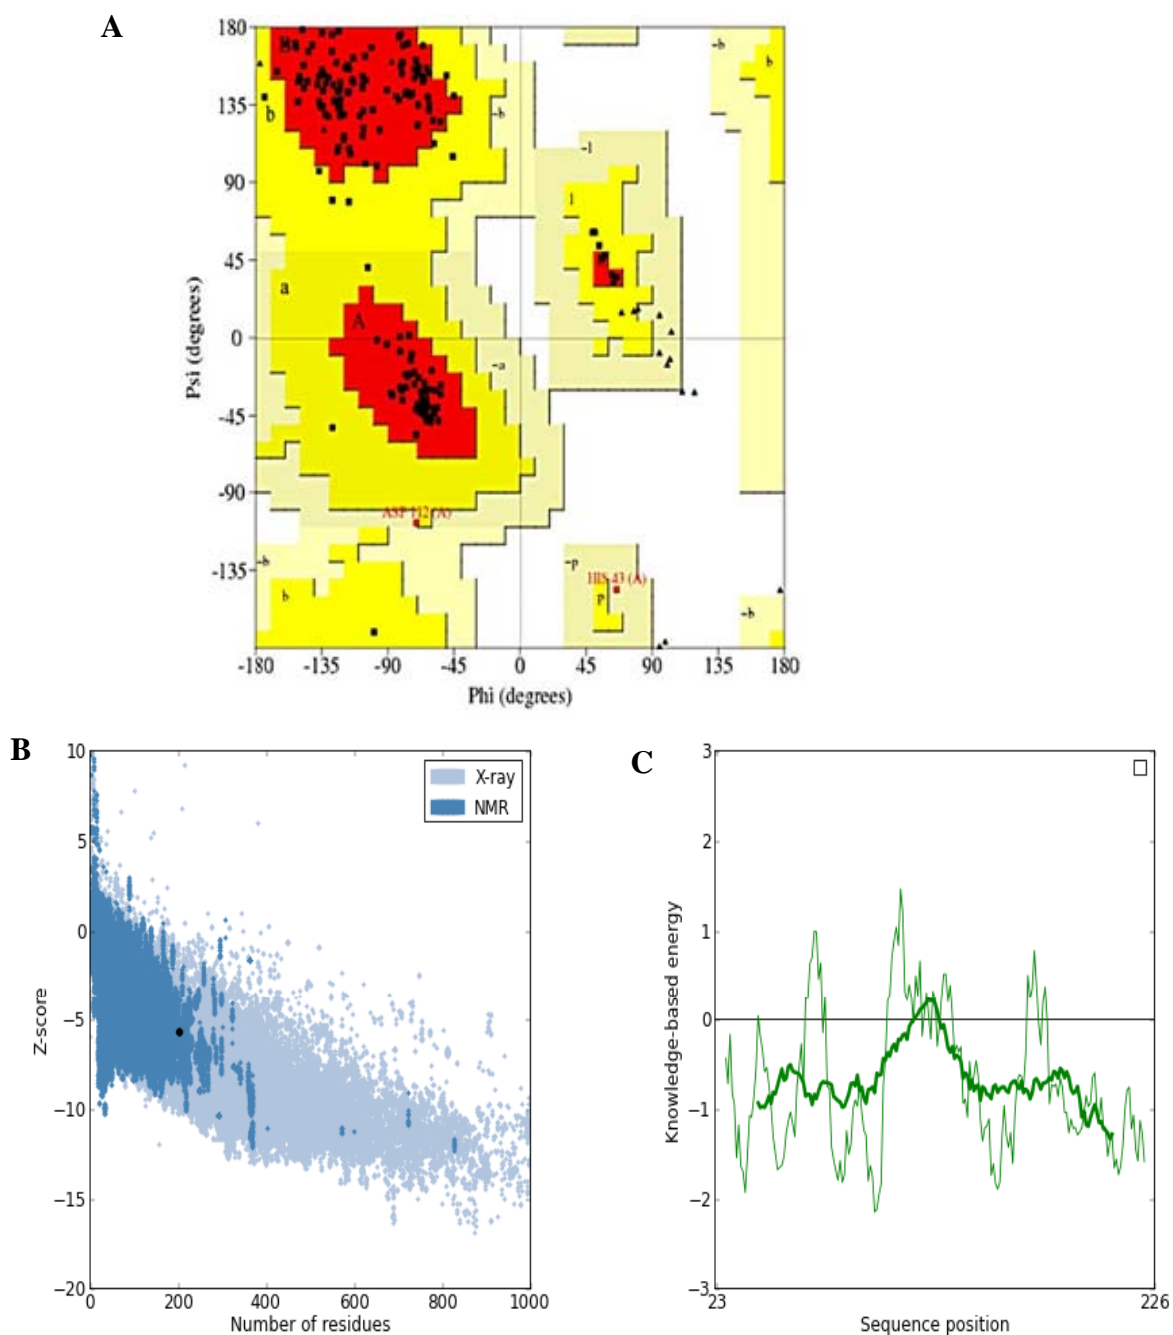

**Supplementary Figure S4.** Validation of the 3D structural model of ObTLP1. **(A)** Ramachandran plot was generated using PROCHECK program of Structure Analysis and Verification Server (SAVES) for the modeled ObTLP1. 94.1% of residues were found in the most favoured regions, 5.4% of residues were in the most allowed regions, and 0.5% of residues were found in the outlier regions. ProSA results showed that 3D model of ObTLP1 is very close to native structure (2VHK) determined by X-ray crystallography. **(B)** Z-score plot showing the quality of the predicted model in NMR region (dark blue). **(C)** Energy plot showing all residues of predicted model at very stable position (dark green).

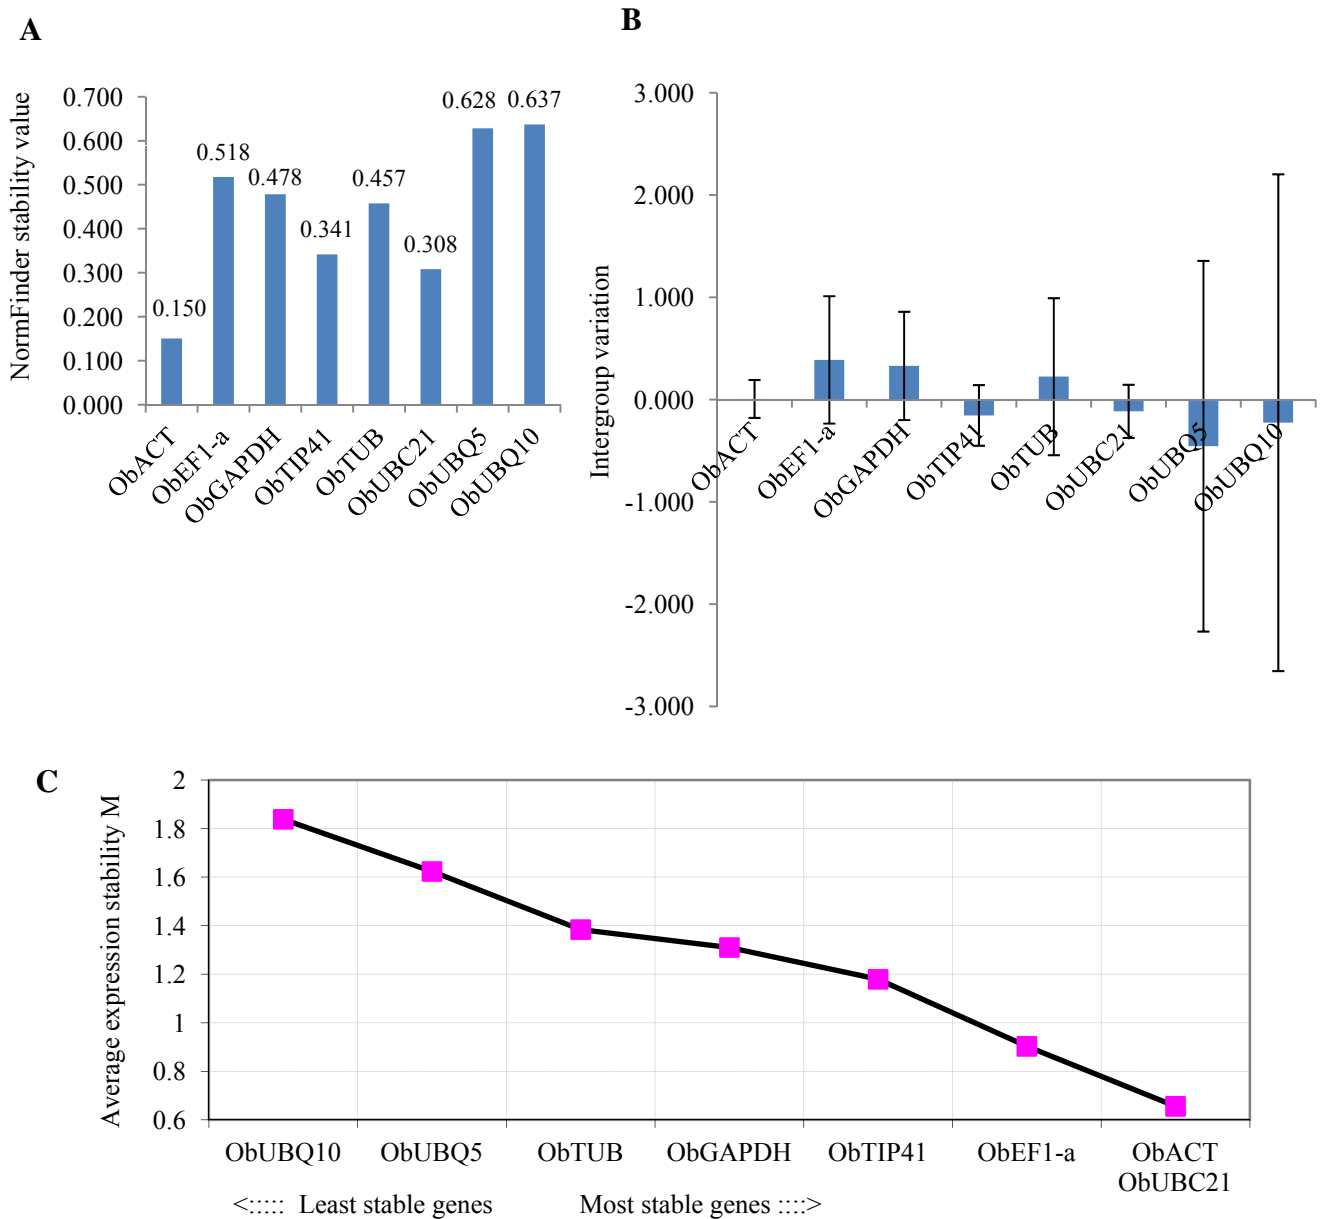

**Supplementary Figure S5.** Identification of stably expressed reference genes, following NormFinder and geNorm programs, for qRT-PCR analysis in *O. basilicum*. (A) Most stably expressed gene has lowest NormFinder stability value. (B) Inter-group variances for the reference genes obtained from NormFinder analysis. Error bars present the average of intra-group variance. An ideal reference gene has close to zero inter-group variation and low intra-group variation. cDNAs were prepared from total of sixteen samples comprising of two groups (normal and treated tissues) with eight samples each. (C) Expression stability (M) of the reference genes determined following geNorm program. Low M value means most stable reference gene.



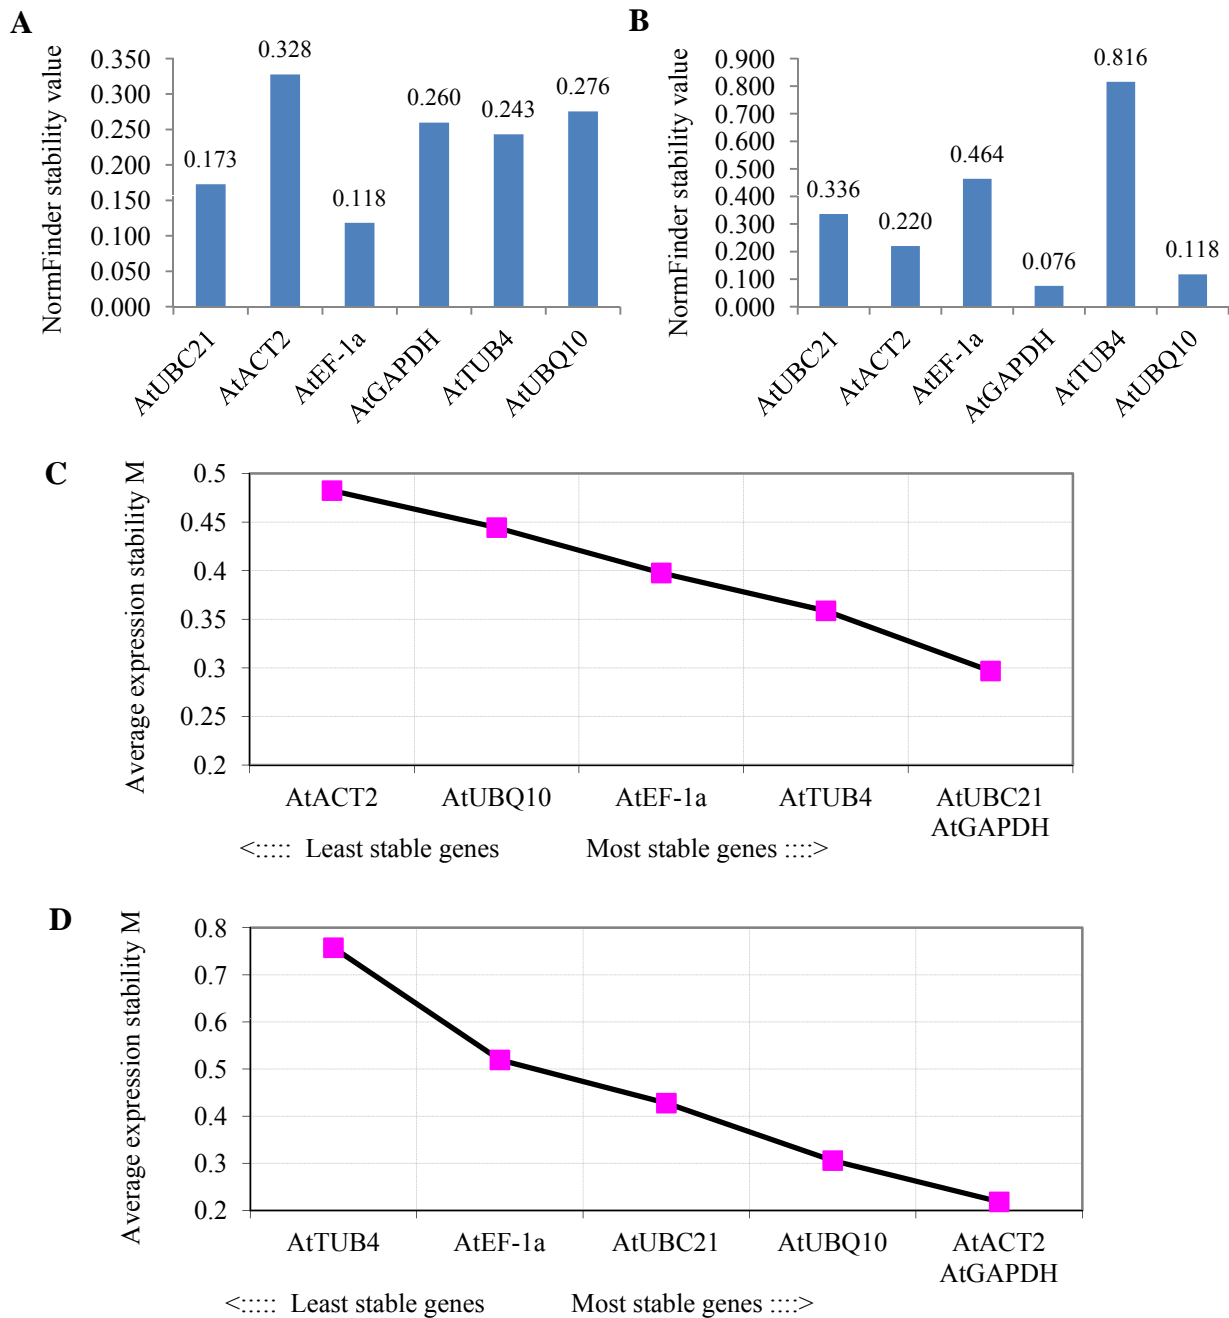

**Supplementary Figure S6.** Identification of stably expressed reference genes of Arabidopsis for qRT-PCR analysis. (A-B) NormFinder stability values of the reference genes for normal (A) and *S. sclerotiorum*-infected (B) leaf tissues. (C-D) Expression stability (M) of the reference genes determined following geNorm program for normal (C) and *S. sclerotiorum*-infected (D) leaf tissues. Twelve and six cDNA samples were used for normal (A, C) and *S. sclerotiorum*-infected (B, D) tissues, respectively.

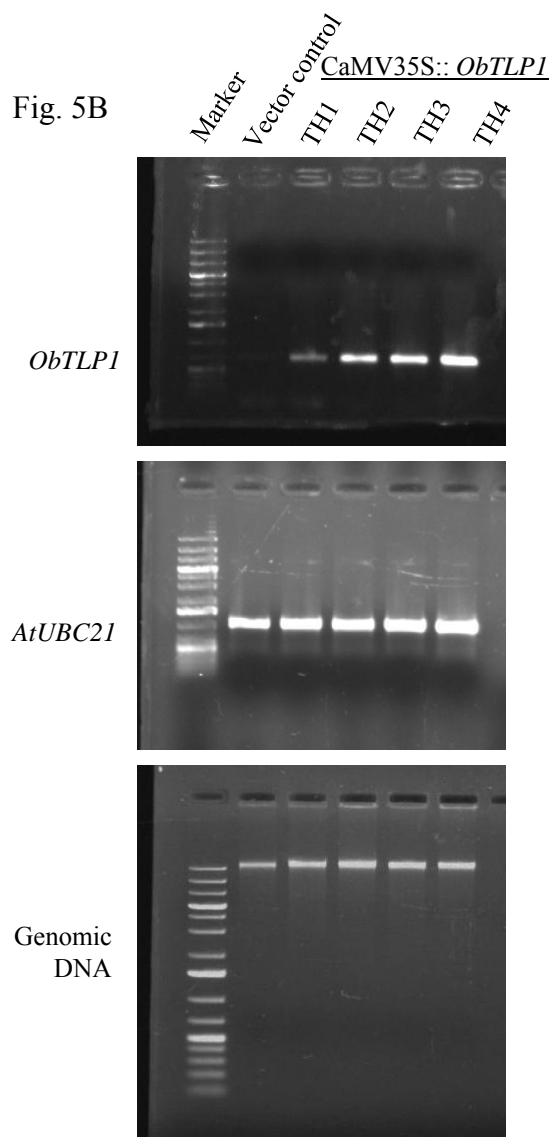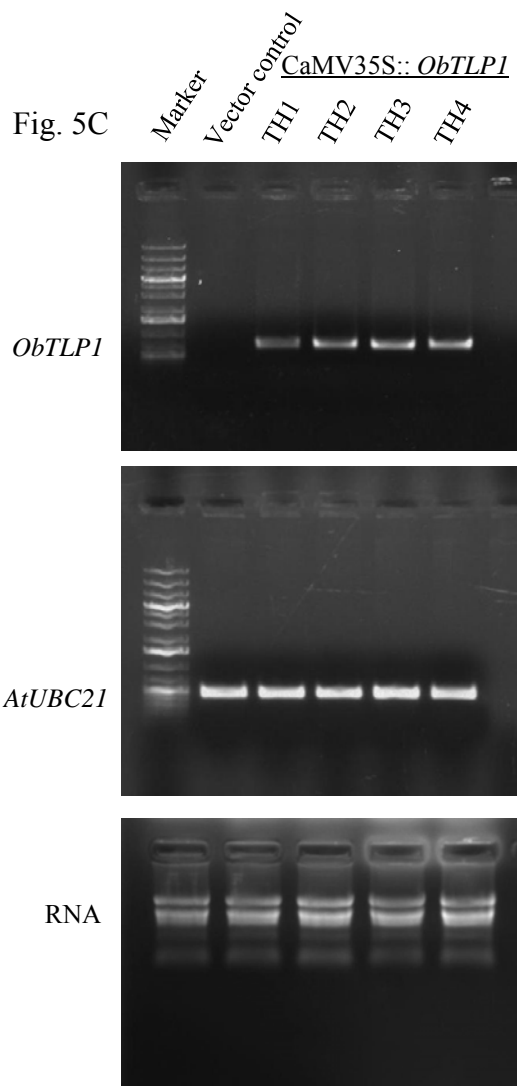

**Supplementary Figure S7.** Full-length gels of main figures Fig. 5B and 5C .

**Supplementary Table S1.** Phenotypic evaluation of *ObTLPI*-expressing Arabidopsis plants

| <b>Parameter</b>                | <b>Vector control</b> | <b>TH1</b>   | <b>TH2</b>   |
|---------------------------------|-----------------------|--------------|--------------|
| Pods/plant                      | 17.14 ± 2.38          | 17.79 ± 2.97 | 18.29 ± 2.61 |
| Weight of mature green pod (mg) | 3.13 ± 0.04           | 3.14 ± 0.04  | 3.12 ± 0.02  |
| Weight of dry pod (mg)          | 1.12 ± 0.05           | 1.14 ± 0.04  | 1.13 ± 0.04  |
| Seeds/pod                       | 37.79 ± 3.72          | 39.5 ± 3.48  | 38.71 ± 3.34 |
| 100 seeds weight (mg)           | 2.03 ± 0.09           | 2.08 ± 0.13  | 2.06 ± 0.09  |

\*Data are the mean ± s.d. (n=14).

**Supplementary Table S2.** List of the primers used in this study.

| Sl. No. | Targets                                              |   | Primer sequences (5' to 3') |
|---------|------------------------------------------------------|---|-----------------------------|
|         |                                                      |   | Semi-quantitative RT-PCR    |
| 1       | <i>ObTLP1</i> (JQ793640)                             | F | ATGAATTCTCTCAAATTCA         |
|         |                                                      | R | TTATGGGCAGAAGACTACC         |
| 2       | <i>ObACT</i> (DY329457)                              | F | GCACTTCCTGTGAACAATAG        |
|         |                                                      | R | AGAGGATACATGTTCCACCAC       |
| 3       | <i>AtUBC21</i> (AT5G25760)                           | F | GGCATCAAGAGCGCGACTGT        |
|         |                                                      | R | GGCGAGGCGTGTATACATTT        |
|         |                                                      |   | Quantitative RT-PCR         |
| 4       | <i>ObTLP1</i> (JQ793640)                             | F | AGATGACGCCGACGACTAAC        |
|         |                                                      | R | CGCCGCGCACTTGAC             |
| 5       | <i>ObEF-1<math>\alpha</math></i>                     | F | CCAATCTGACCAGGGTGGTT        |
|         |                                                      | R | GACATGCGTCAGACGGTTGT        |
| 6       | <i>ObGAPDH</i>                                       | F | GGATGGCATTCCGAGTTCCT        |
|         |                                                      | R | GCCCTCAGACTCCTCCTTGAT       |
| 7       | <i>ObTIP41</i>                                       | F | CGGATTCCTCATTCGTGGTT        |
|         |                                                      | R | CGGCAATGGGTTGTCTGA          |
| 8       | <i>ObTUB</i>                                         | F | CGAGCACGGAGTTGATCCA         |
|         |                                                      | R | GCCGGAAGCCTCATTGAA          |
| 9       | <i>ObUBC21</i>                                       | F | CCGGTGGCCCTTTATAAGA         |
|         |                                                      | R | CGACGGCGAGGCTTTTTAA         |
| 10      | <i>ObUBQ5</i>                                        | F | GCGAAGATGAGACGCTGTTG        |
|         |                                                      | R | CCTAGAGTTGAGGCCAGTGA        |
| 11      | <i>ObUBQ10</i>                                       | F | TGGGTCTCAGTTGTCTGTTGGT      |
|         |                                                      | R | CGGCAGGTGAGTTGTTACACA       |
| 12      | <i>ObACT</i> (DY329457)                              | F | GGGCTGTTATTCCTTGCTCAT       |
|         |                                                      | R | CGTGCTCAGTGGTGGATCAA        |
| 13      | <i>AtUBC21</i> (AT5G25760)                           | F | CTGAGCCGGACAGTCCTCTT        |
|         |                                                      | R | TAGCGGCGAGGCGTGTATAC        |
| 14      | <i>AtACT2</i> (AT3G18780)                            | F | CCTTTGTTGCTGTTGACTACGA      |
|         |                                                      | R | CTGAATCTCTCAGCACCAA         |
| 15      | <i>AtEF-1<math>\alpha</math></i> (AT5G60390)         | F | CCCCTTCGTCTTCCACTTCA        |
|         |                                                      | R | CCCTGTGGGAGCAAAGGTAA        |
| 16      | <i>AtGAPDH</i> (AT1G13440)                           | F | CAAGGCTGCTGCTCACTGA         |
|         |                                                      | R | CGAACATGGGCGCATCTT          |
| 17      | <i>AtTUB4</i> (AT5G44340)                            | F | TCGGCGATTCTCCGTTACAG        |
|         |                                                      | R | CAGCGCGAGGAACGTACTTT        |
| 18      | <i>AtUBQ10</i> (AT4G05320)                           | F | GGAGGTGGAGAGTTCTGAC         |
|         |                                                      | R | GCGAAGATCAATCTCTGCT         |
| 19      | <i>S. sclerotiorum</i> ITS genomic DNA (KC748491)    | F | GGTGAACCTGCGGAAGGAT         |
|         |                                                      | R | AAGAGCAGCTCGCCAAAGC         |
| 20      | <i>B. cinerea Actin</i> genomic DNA (NW_001814525)   | F | CCGTCTGGATTGGTGGTTCT        |
|         |                                                      | R | CACTTGCGGTGGACAATGG         |
| 21      | <i>AtVSP1</i> (AT5G24780)                            | F | GGGAACGAAGCCGAACCTCTT       |
|         |                                                      | R | GGGCACCGTGTCTGAAGTTTA       |
| 22      | <i>AtPRI</i> (AT2G14610)                             | F | CTCGGAGCTACGCAGAACAAC       |
|         |                                                      | R | CCGCTACCCCAGGCTAAGTT        |
| 23      | <i>AtPDF1</i> (AT5G44420)                            | F | CGCTGCTCTTGTCTCTTTGC        |
|         |                                                      | R | CCCTGACCATGTCCCACTTG        |
| 24      | <i>AtPAL1</i> (AT2G37040)                            | F | CCCCTCCGTGGTACAATCAC        |
|         |                                                      | R | CTTCACCGTTGGGACCAGTAG       |
| 25      | <i>AtBGL2</i> (AT3G57260)                            | F | CCTCGACGTTCCAGTTCAG         |
|         |                                                      | R | ACTTGTCGGCCTCCGTTTG         |
| 26      | <i>Arabidopsis Rubisco Large Subunit</i> (Atcg00490) | F | TGTTCTGCCTGTGGCTTCAG        |
|         |                                                      | R | CCCAAGGGTGGCCTAAAGTT        |

|    |                          |   |                                  |
|----|--------------------------|---|----------------------------------|
|    |                          |   | pET pET-28a(+) cloning           |
| 27 | <i>ObTLP1</i> (JQ793640) | F | CTGGATCCATGAATTCTCTCAAATTCA      |
|    |                          | R | AACTCGAGTTATGGGCAGAAGACTACC      |
|    |                          |   | pBI 121 cloning                  |
| 28 | <i>ObTLP1</i> (JQ793640) | F | GCTCTAGAATGAATTCTCTCAAATTCATCTCC |
|    |                          | R | GGGAAATTTATGGGCAGAAGACTACC       |
